# Supplementary material for: Effects of enhanced STI partner notification counselling and provider-assisted partner services on partner referral and the incidence of STI diagnosis in Cape Town, South Africa: randomised controlled trial
Source: PubMed Central journal article supplement — Sex Transm Infect. 2020 Jun 1;97(1):38–44. doi: 10.1136/sextrans-2020-054499 (PMC7841487; doi:10.1136/sextrans-2020-054499), 2020-06-01

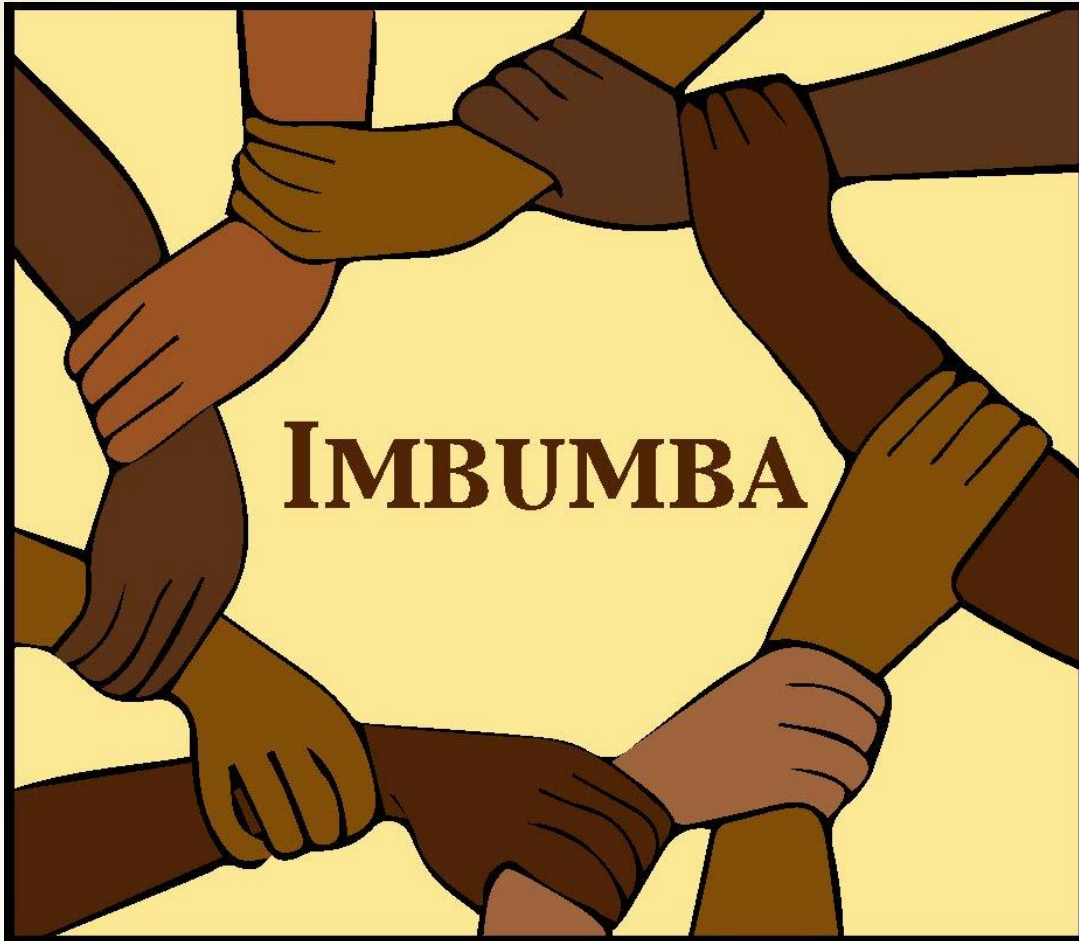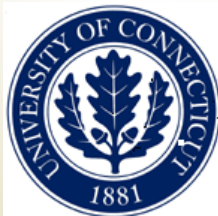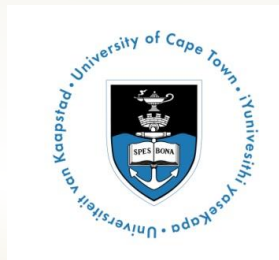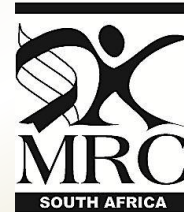

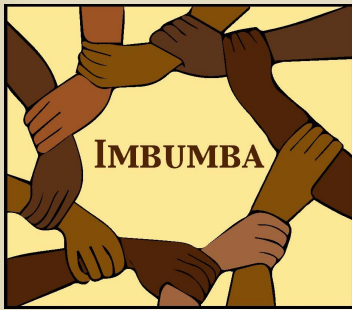

# WELCOME TO Imbumba?

## What is Imbumba?

**Learn about sexual health**

**Focus on you**

**Answer YOUR sexual health  
questions**

**Everything is confidential**

**Audio record session**

# What do you know about STI's?

STI's can be hard to...

Look  
at

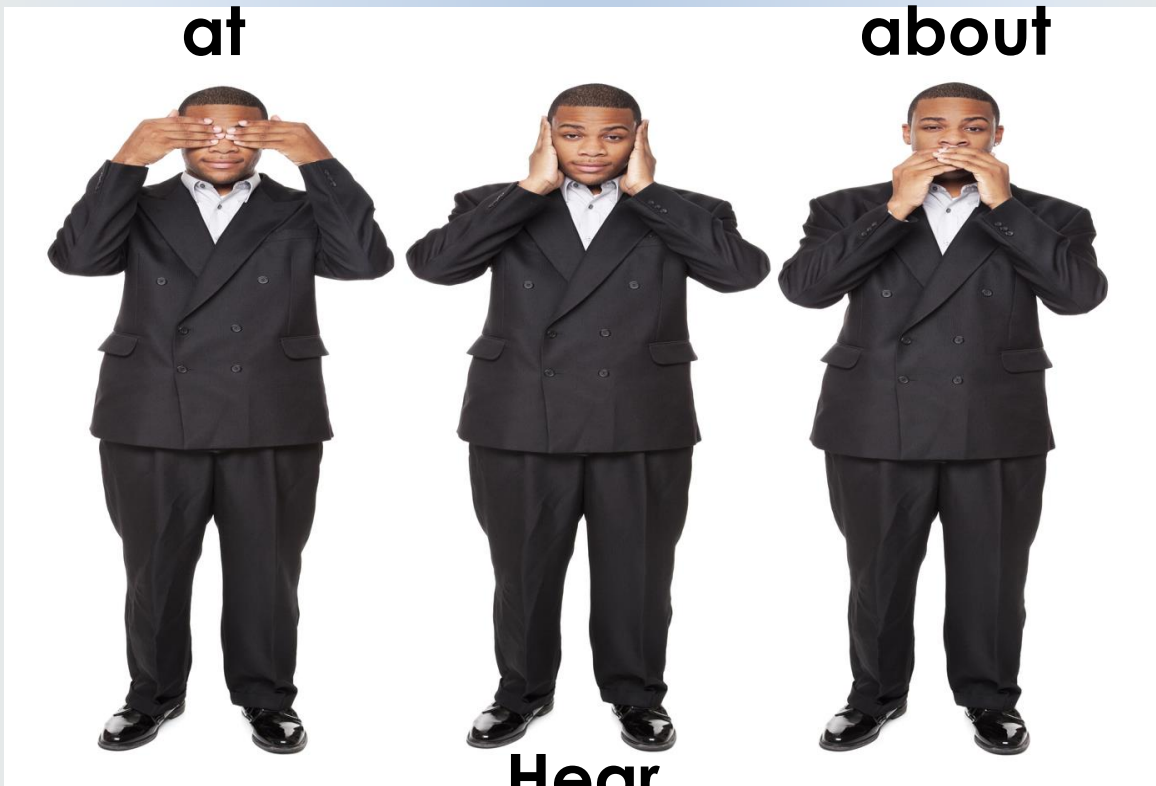

Talk  
about

Hear  
about

# STI'S CAN HAVE NO SIGNS OR SYMPTOMS

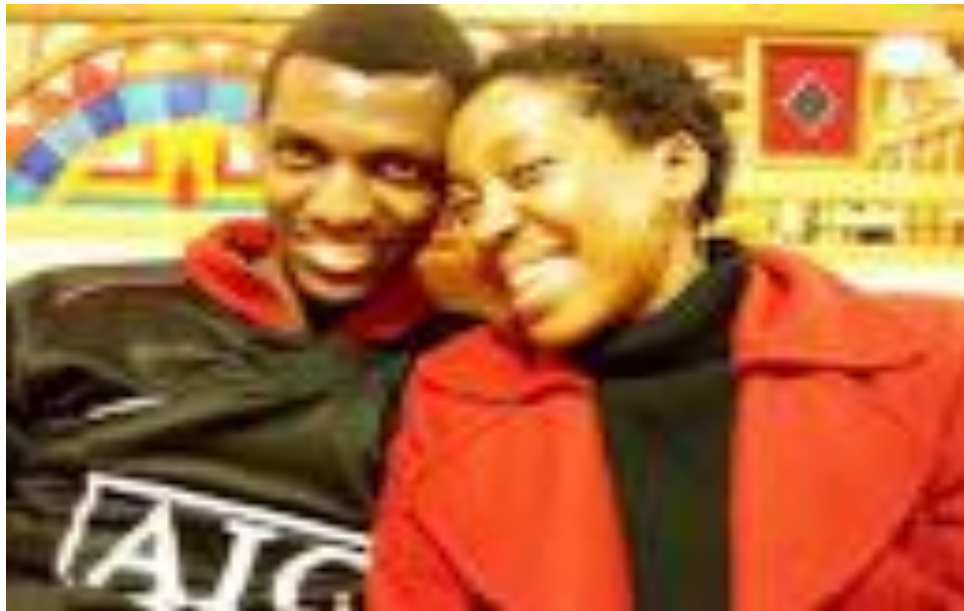



# Common Sexually Transmitted Infections (STIs)

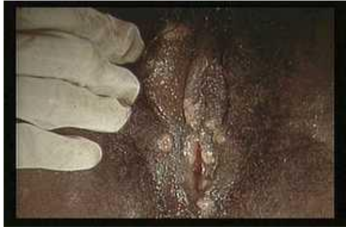

**Syphilis (Gcushuwa)**  
 Rash, open sore,  
 Discharge,  
**Curable**

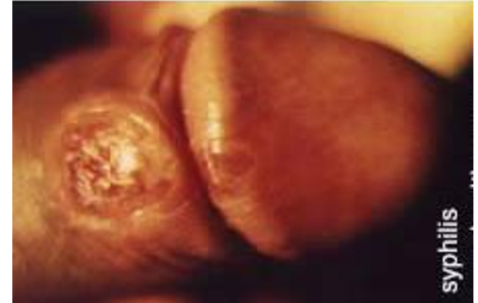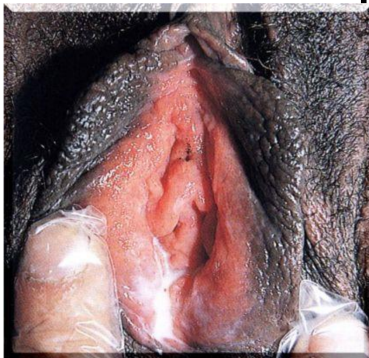

**Gonorrhea (Drop)**  
 Discharge,  
 pain/burning  
**Curable**

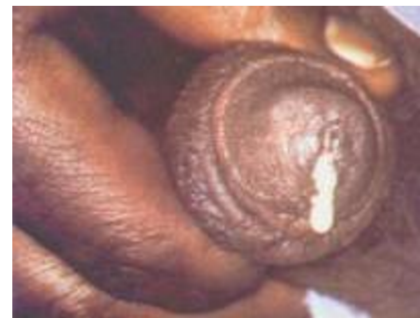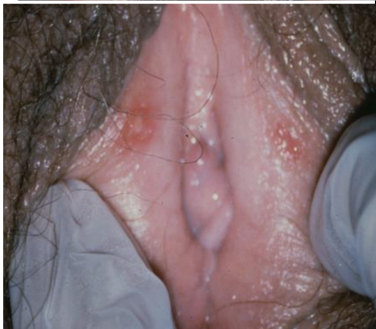

**Genital herpes (Blisters)**  
 Open sores,  
 Painful blisters  
**Treatable**

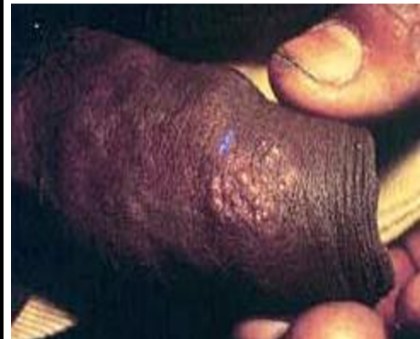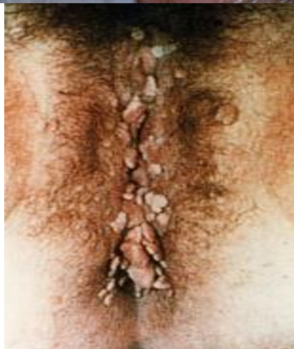

**Genital warts**  
 Painful bumps,  
 Can be removed  
**Treatable**

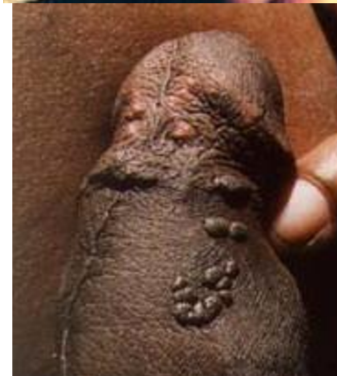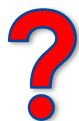

**HIV/AIDS**  
 No signs  
**Treatable**

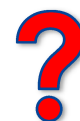

**Tell me about your  
most recent visit to this  
clinic...**

# What can you do to avoid getting an STI in the future?

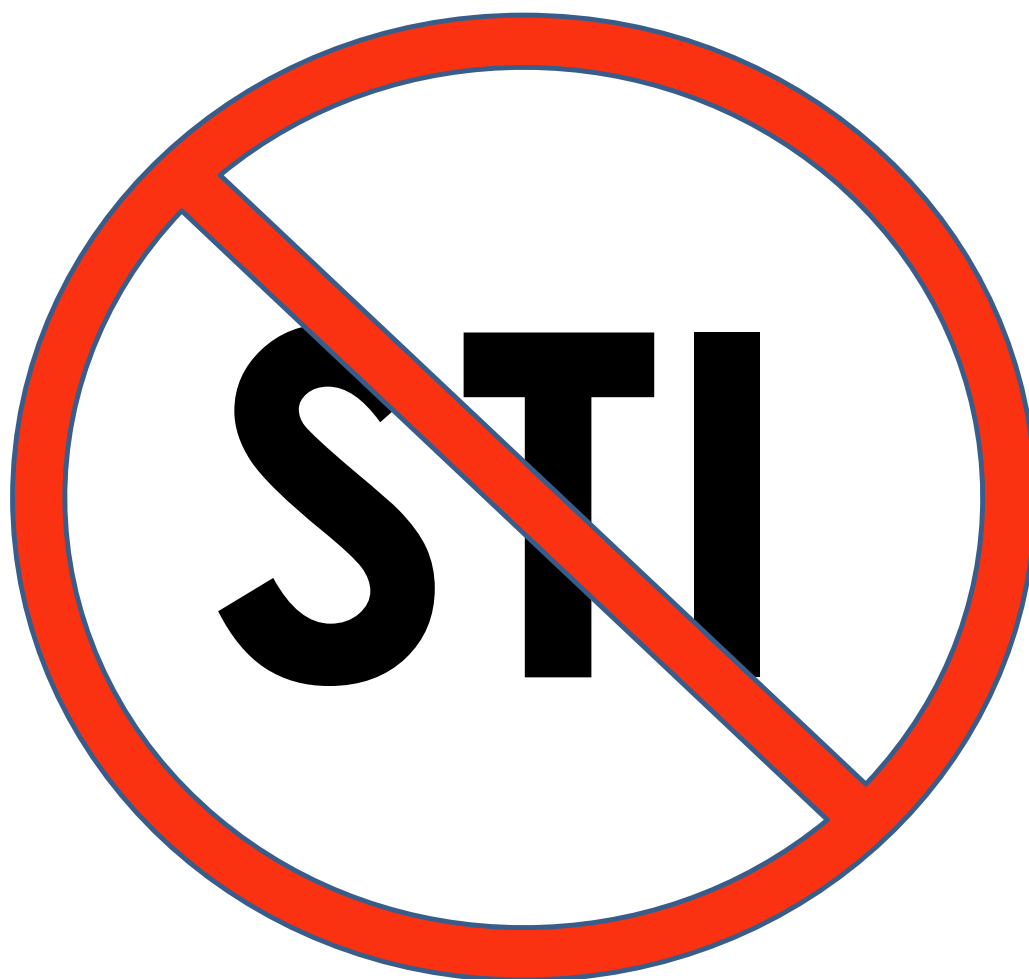

# How about condoms?

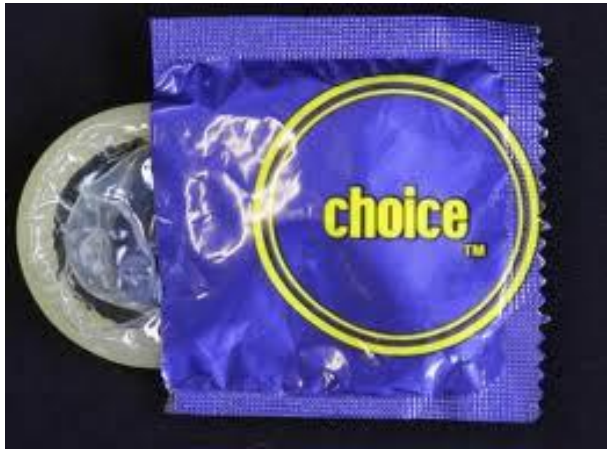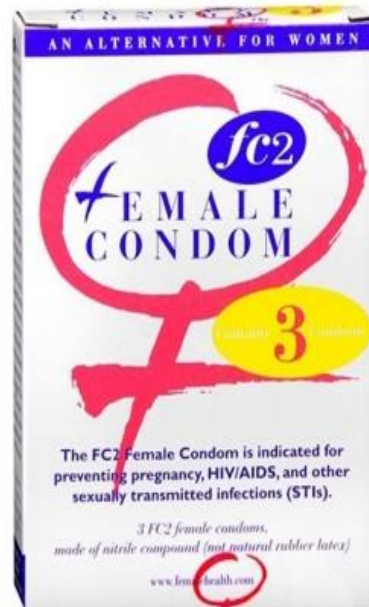

# Not Just Condoms...

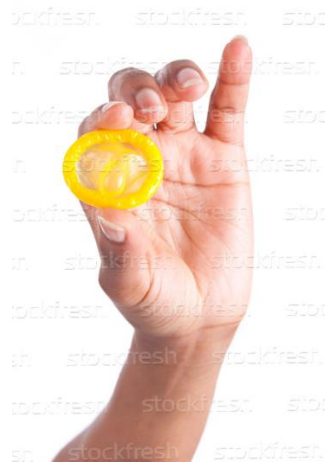

**...Also ONLY having  
sex with partners  
that do not have an  
STI.**

# Sexual Network

Your sex partners and your partner's past and current partners.

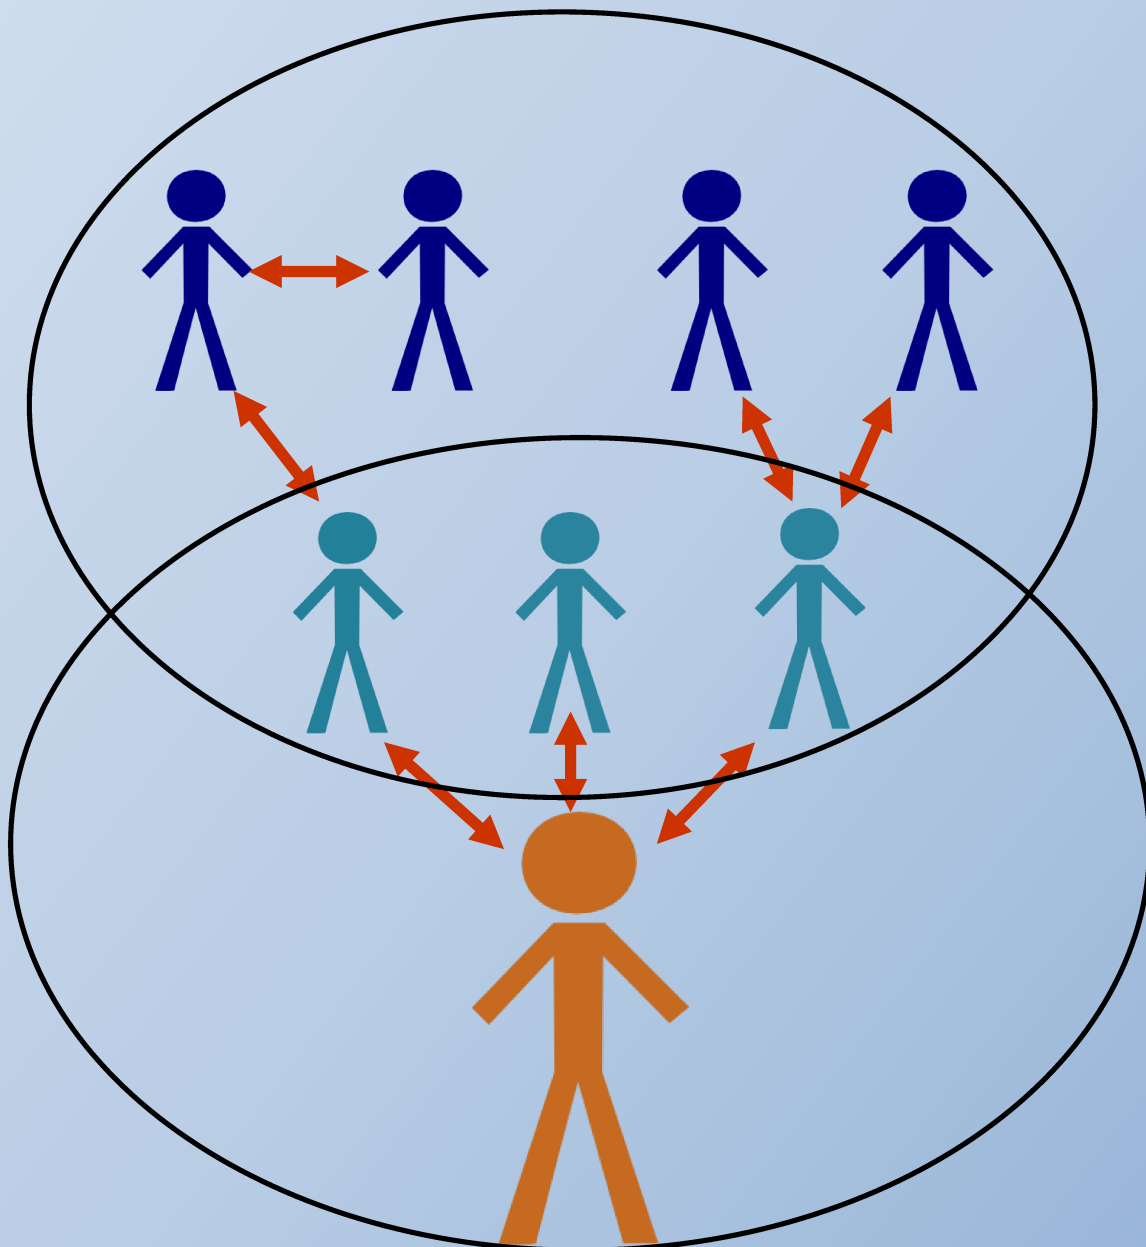



# Stopping the Spread of STI's and HIV

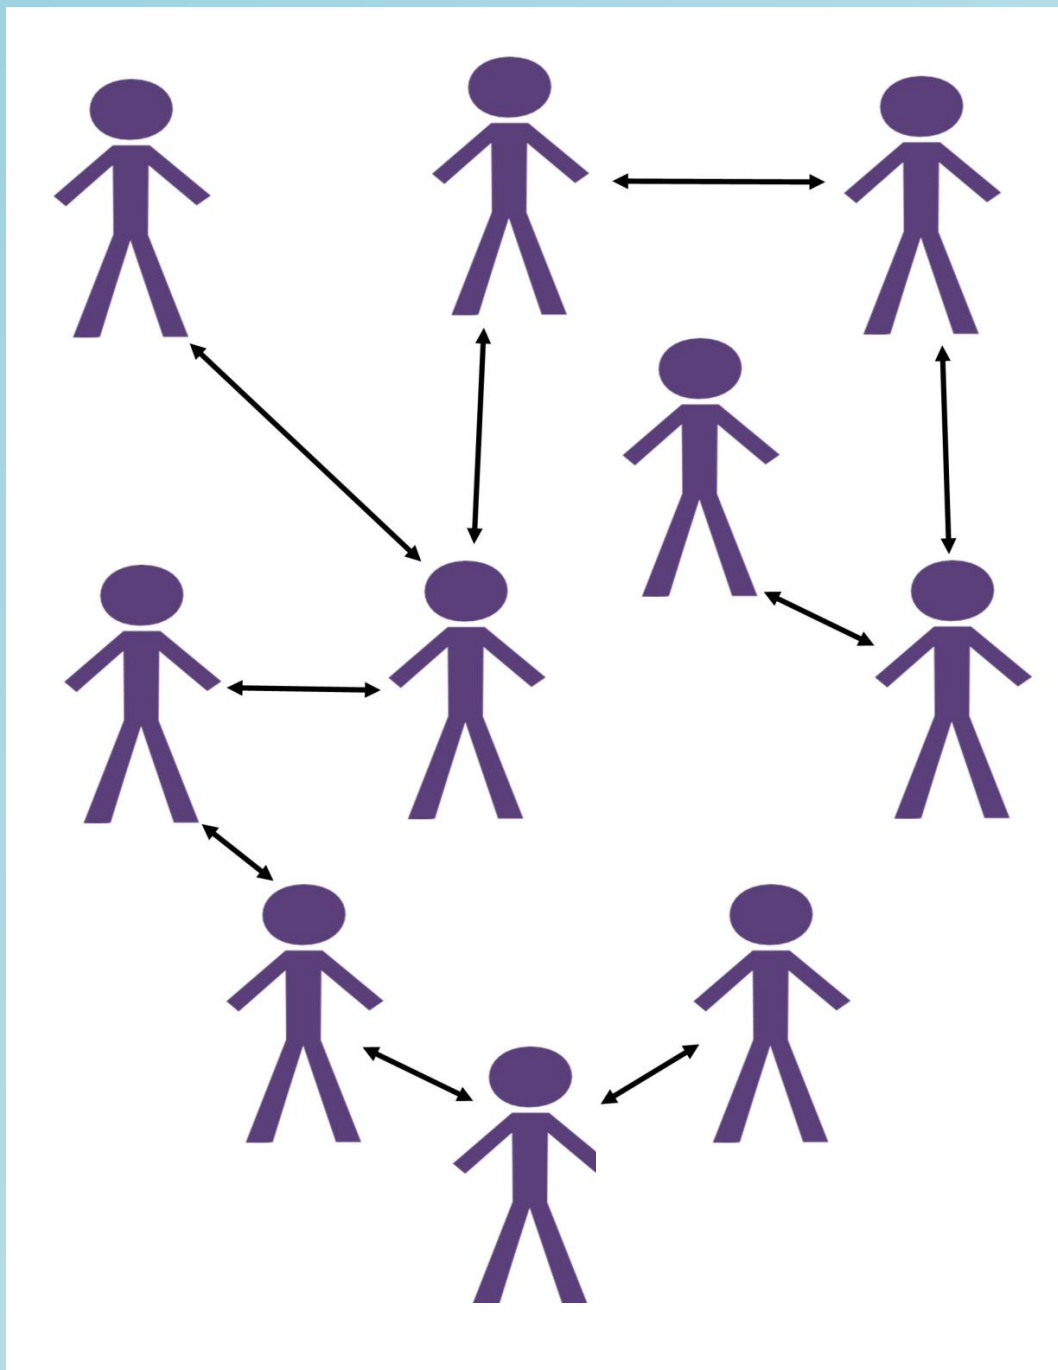

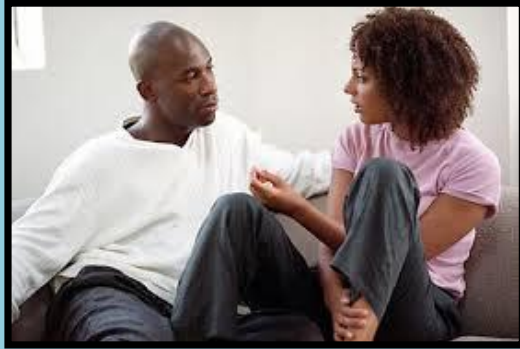

**Everyone must tell  
their partners so  
their partners can  
get and treated.**

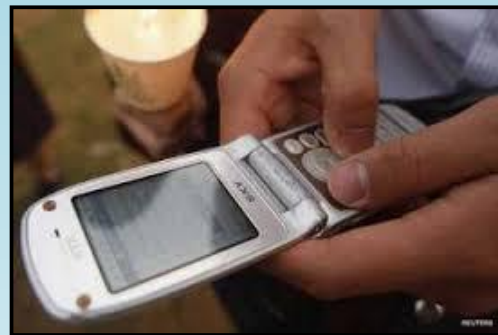

# Your Sexual Network

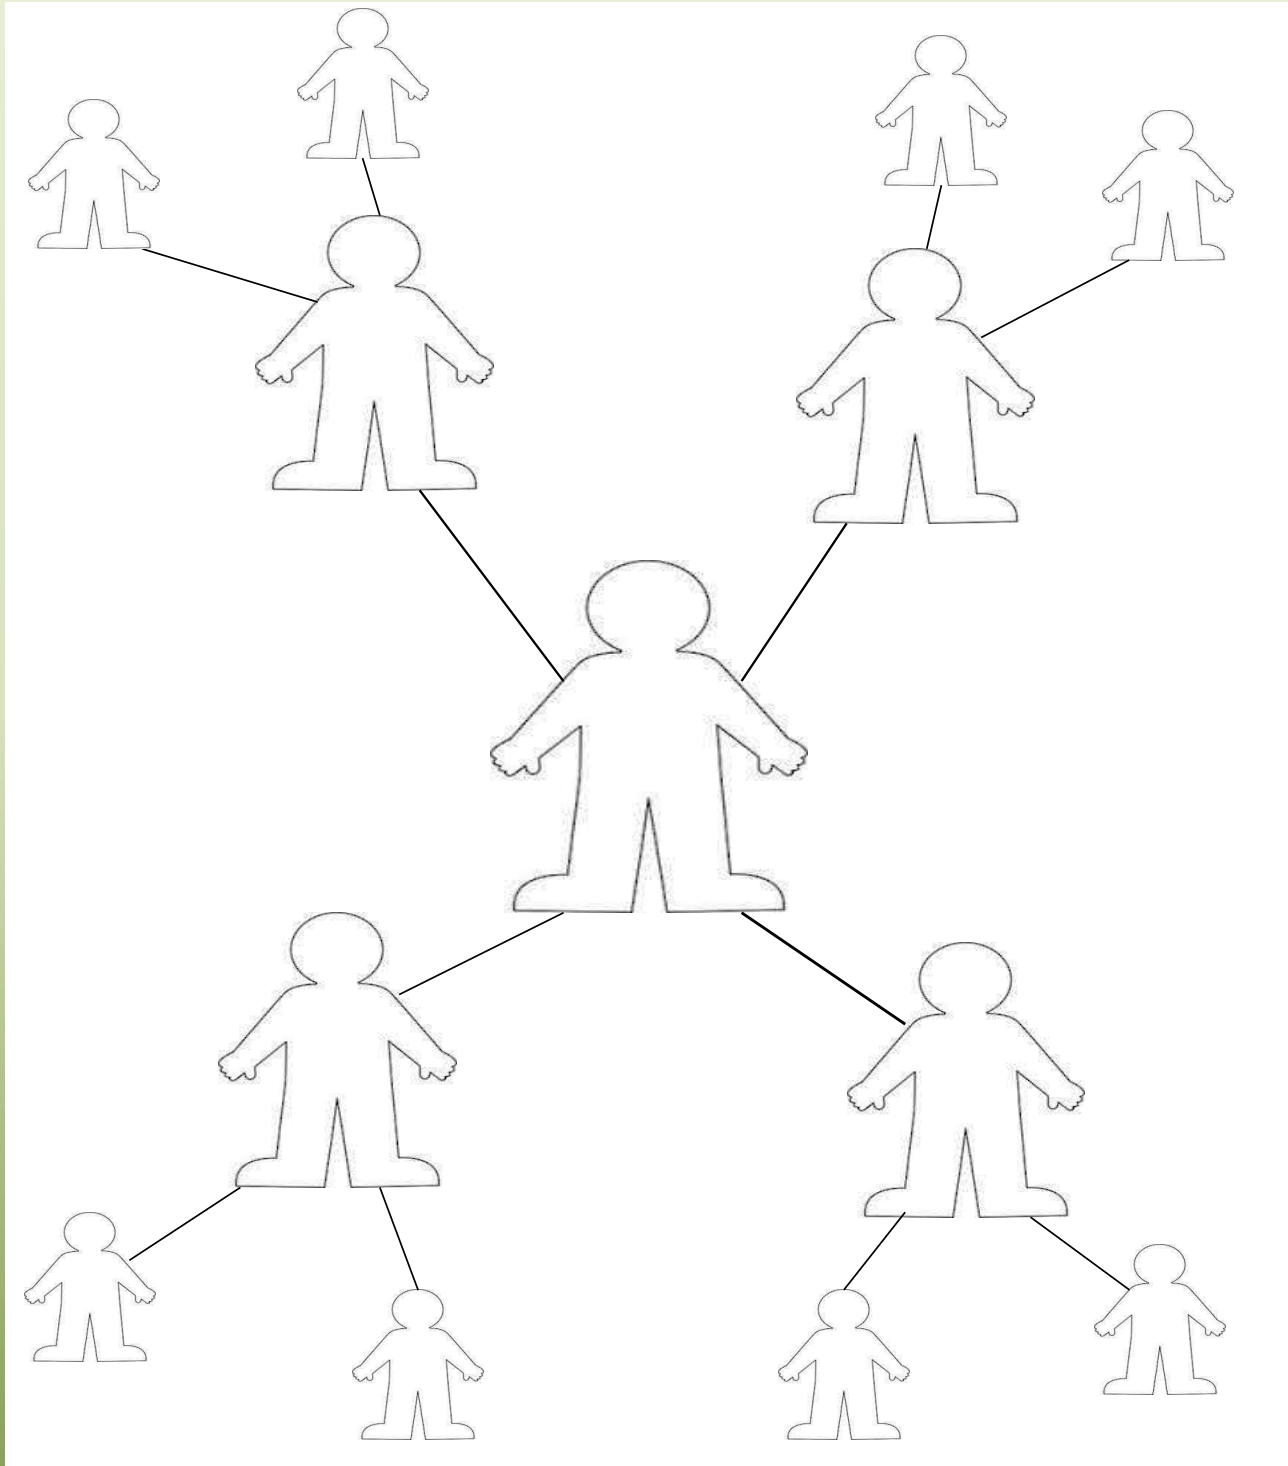

# MANY OPTIONS TO TELL

## YOU TELL

- Face to face
- Phone call
- SMS
- Email
- Give clinic card
  - ~In person
  - ~Mail
  - ~Leave for
- Come to the clinic together

## I TELL

- Phone call
- SMS
- Email
- Mail card

# Face To Face

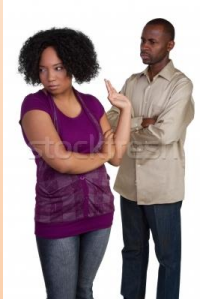

## In person

**~What might you say?**

**~When might you do this?**

**~How might your partner respond?**

**~Do you have any concerns for your physical or emotional safety?**

**~ How likely is it they would go a clinic to get treated?**

# Give The Clinic Card

**Mail the card**

**Give the card to them**

**Leave the card for them**

**~What might you say?**

**~When might you do this?**

**~How might they respond?**

**~How likely is it they would go a clinic to get treated?**



## **Get Tested/Treated Together**

**Invite your partner to come to the clinic and get checked/treated with you.**

**~What might you say?**

**~How might they respond?**

**~Do you have any concerns for your physical or emotional safety?**

**~How likely do you think they would be to go to get checked/treated with you at the clinic?**

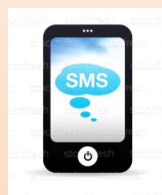

# You Tell...

**SMS**

**Email**

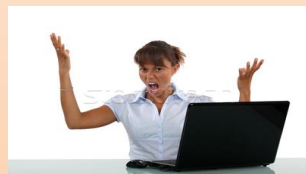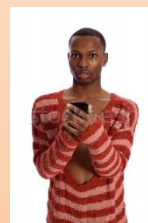

**Phone call**

**~What might you say?**

**~When might you do this?**

**~How might they respond?**

**~Do you have any concerns for your physical or emotional safety?**

**~How likely is it they would go a clinic?**

**~How likely do you think they would be to go to get checked/treated at the clinic?**

# **I Send...**

## **SMS You may remain anonymous**

**“Message from a Cape Town Health clinic: One of your sex partners is being treated for an STI. Please visit a clinic to be checked/treated.”**

**~How might your partner respond?**

**~Do you have any concerns for your physical or emotional safety?**

**~Do you think they will know who exposed them?**

**~How likely do you think they would be to go to a clinic to get treated?**

# I Send...

## Email You may remain anonymous

**“Subject line: Message from a Cape Town Health Clinic**

**Body: One of your sex partners is being treated for an STI. Please visit a clinic to be checked/treated.”**

**~How might your partner respond?**

**~Do you think they will know who exposed them?**

**~How likely do you think they would be to go to a clinic to get treated?**

# **I Tell...**

## **Phone call You may remain anonymous**

**~How might your partner respond?**

**~Do you think they will know who  
exposed them?**

**~Do you have any concerns for your  
physical or emotional safety?**

**~How likely do you think they would be  
to go to a clinic to get treated?**

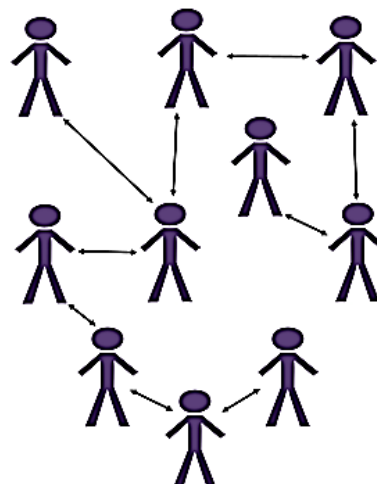

## REMEMBER...

- ~STI's get passed in sexual networks.
- ~Your partners probably do not know that they have an STI.
- ~Condoms CAN stop the spread of STI's.
- ~Telling partners so they can get treated CAN stop the spread of STI's
- ~Wear a condom till you COMPLETE your STI treatment.
- ~Until your partners are treated, partners will keep giving you an STI.

# THANK YOU!



# APPENDIX

# How to Use a Male Condom

Latex is Best!

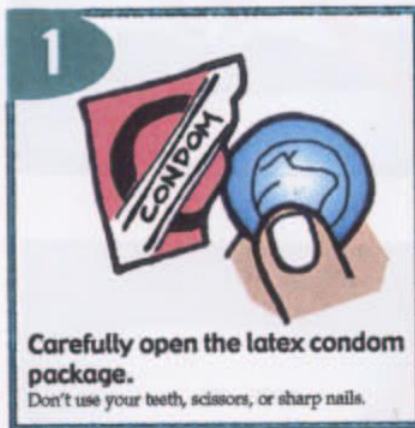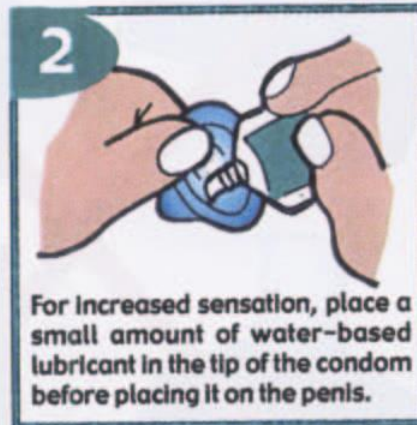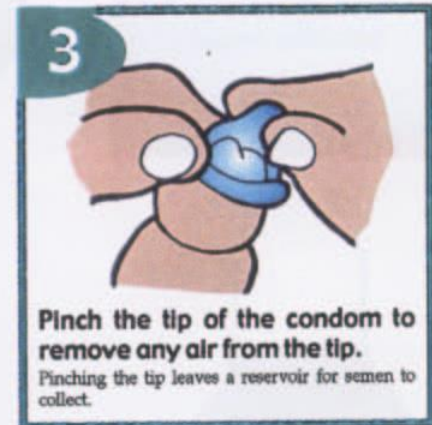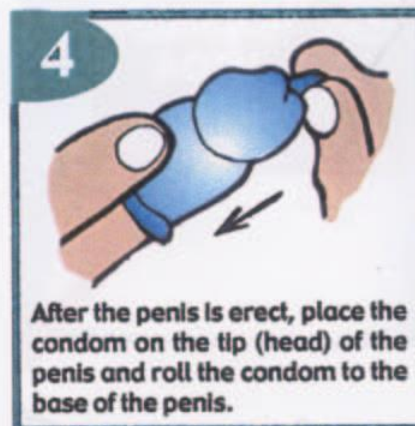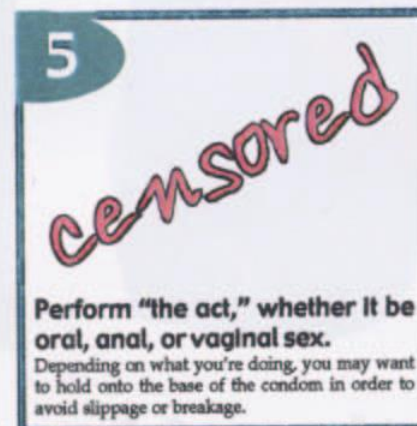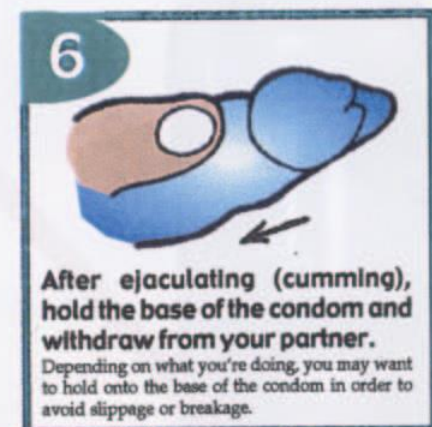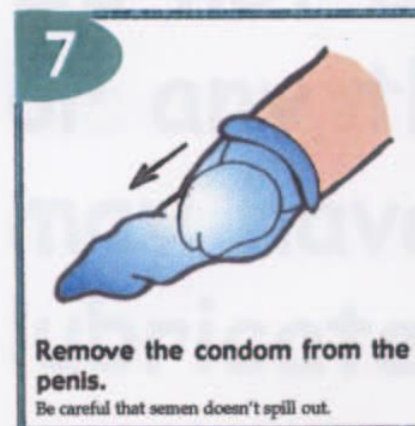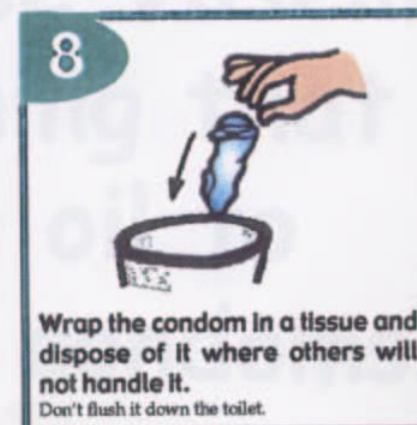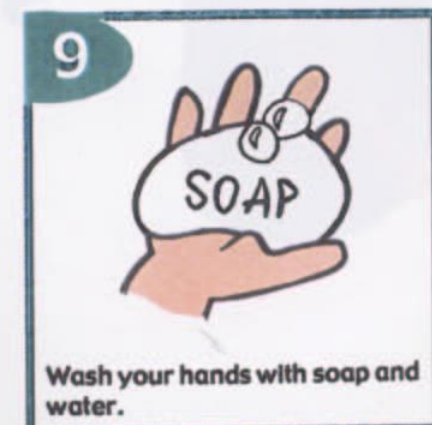



# How to Use a Female Condom

Information and art work courtesy of The Female Health Company

**1**



**Carefully open the Reality® Female Condom package.**  
Rub the outside of the pouch together and make sure the lubrication is evenly spread inside the pouch.

**2**



Outer ring (add extra lubrication if wanted)  
Inner ring at the bottom (add extra lubrication if wanted)

**Find a comfortable position. Be sure the inner ring is at the bottom, closed-end of the pouch.**

**3**



Index finger  
Inner ring  
Open end

**Grab the inner ring with your thumb and middle finger, and pinch the edges together (like a diaphragm).**

**4**



**Still squeezing Reality, use your other hand to spread your vagina and insert the condom.**

**5**



Pubic bone

**Use the index finger to guide the condom into the vagina, being careful not to twist the condom.**  
Push the ring in until the cervix is completely covered. The ring should then fall into place.

**6**



**Until you and your partner become comfortable using Reality, use your hand to guide the penis into the vagina.**

**7**

*censored*

**Have vaginal sex. Make sure the outer ring stays outside the vagina. After ejaculation...**

**8**



**...squeeze and twist the outer ring to keep the sperm inside the pouch.**  
Remove the condom by pulling, being careful not to spill the semen.

**9**



YES NO

**Dispose of the condom in a trash can. If possible, wash your hands with soap and water.**  
Do not flush the condom or reuse it.

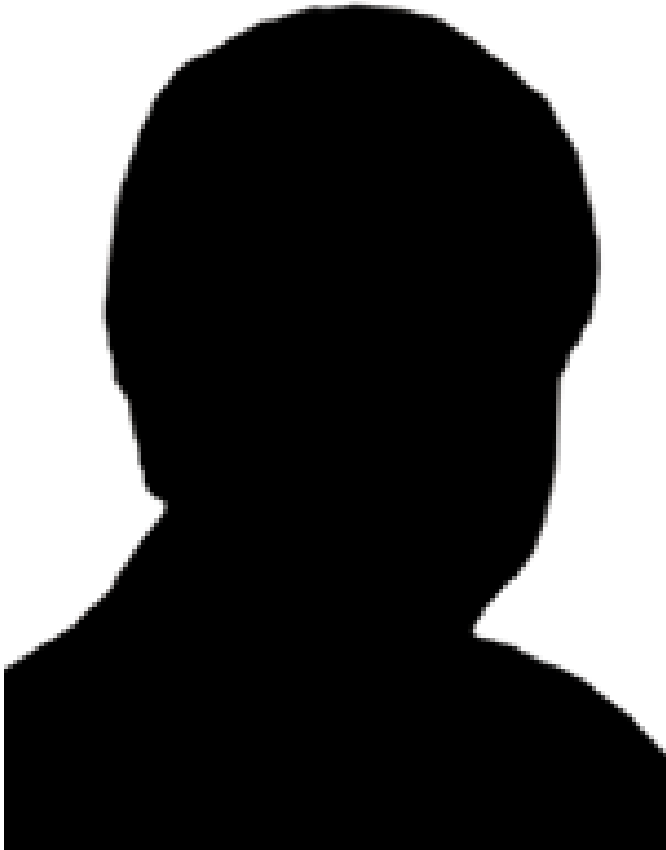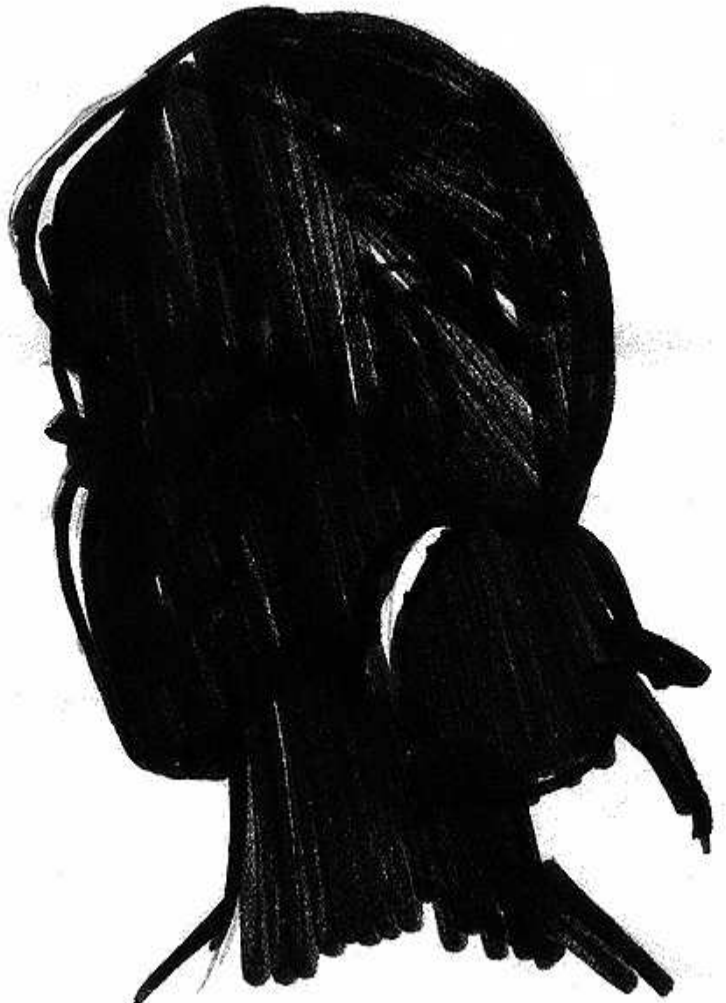

Supplement: sextrans-2020-054499supp001.pdf [file sextrans-2020-054499supp001.pdf]
