# Supplementary material for: Effects of enhanced STI partner notification counselling and provider-assisted partner services on partner referral and the incidence of STI diagnosis in Cape Town, South Africa: randomised controlled trial
Source: PubMed Central journal article supplement — Sex Transm Infect. 2020 Jun 1;97(1):38–44. doi: 10.1136/sextrans-2020-054499 (PMC7841487; doi:10.1136/sextrans-2020-054499), 2020-06-01
Supplement: sextrans-2020-054499supp005.pdf [file sextrans-2020-054499supp005.pdf]

# IMBUMBA EDUCATION COUNSELLING SESSION

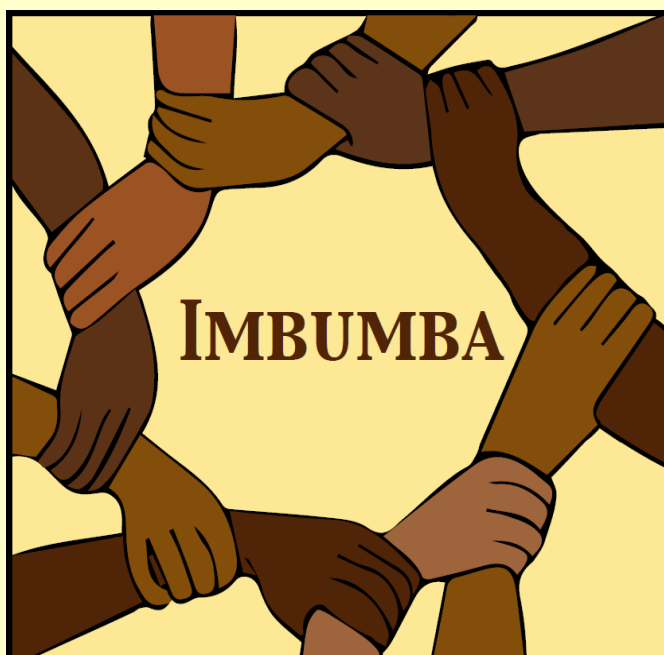

**WHAT IS THIS  
PROGRAM  
ABOUT?**

**20 MIN. OF HEALTH  
INFORMATION**

**GETTING THE FACTS  
ANSWERING YOUR  
QUESTIONS**

**AUDIO RECORD  
SESSION TODAY**

**EVERYTHING IS  
CONFIDENTIAL**

**TELL ME ABOUT YOURSELF**

**DO YOU HAVE  
ANY QUESTIONS?**

**HOW DO YOU  
FEEL RIGHT NOW?**

**WHAT DO YOU  
KNOW ABOUT STIS?**

# WHEN YOU HAVE SEX, YOU CAN GET AN STI FROM YOUR PARTNER'S PAST PARTNERS AND ALL OF THEIR PARTNERS

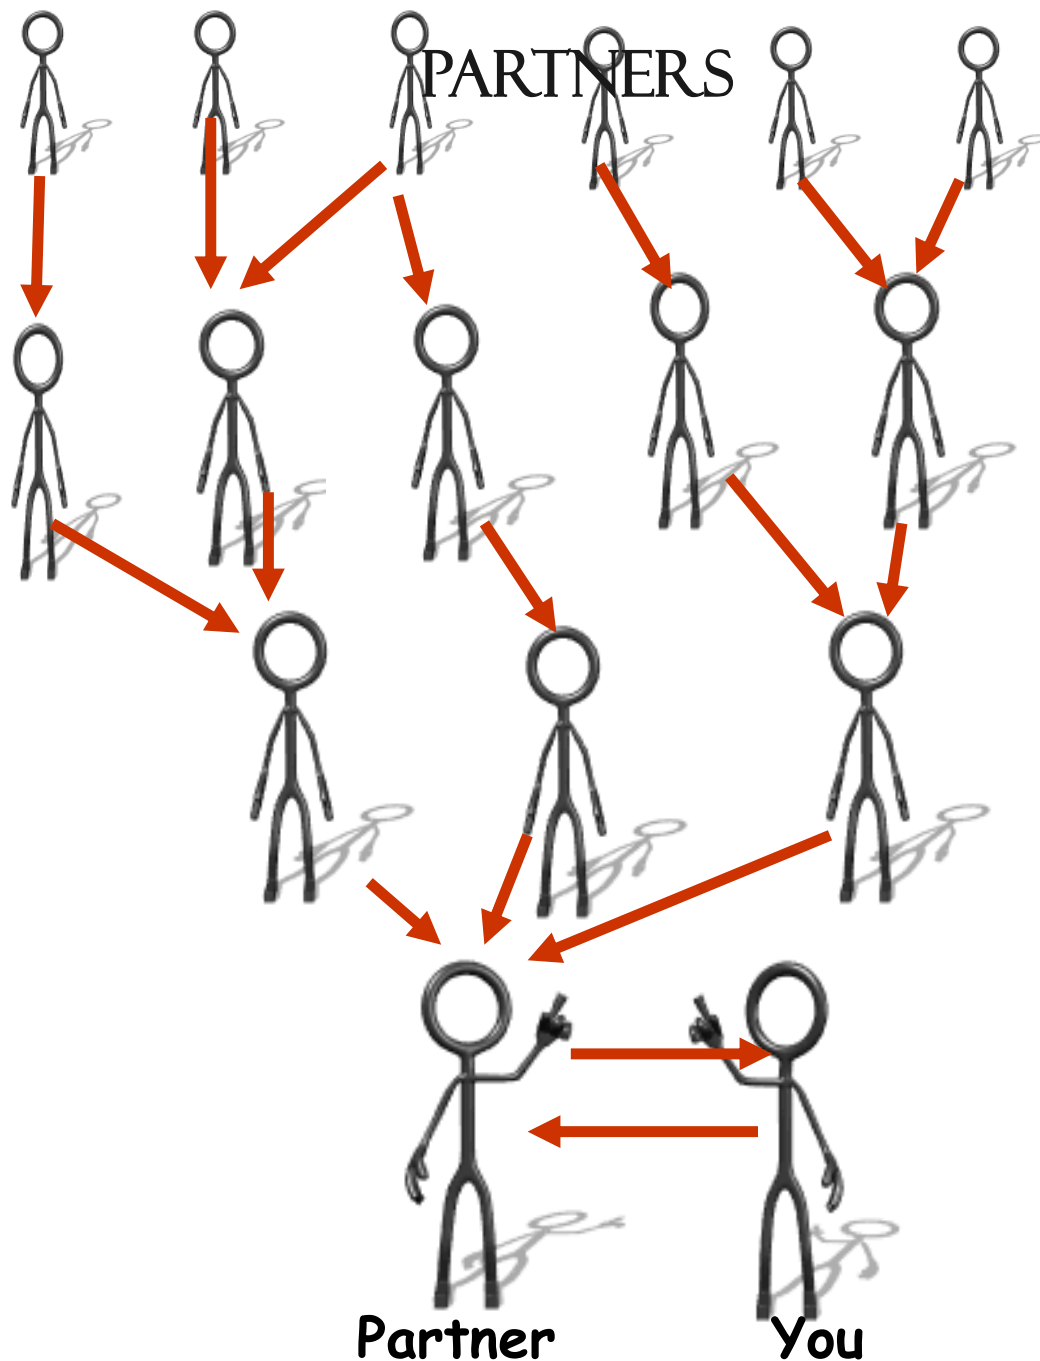

# AN STI CAN HAVE NO SIGNS OR SYMPTOMS

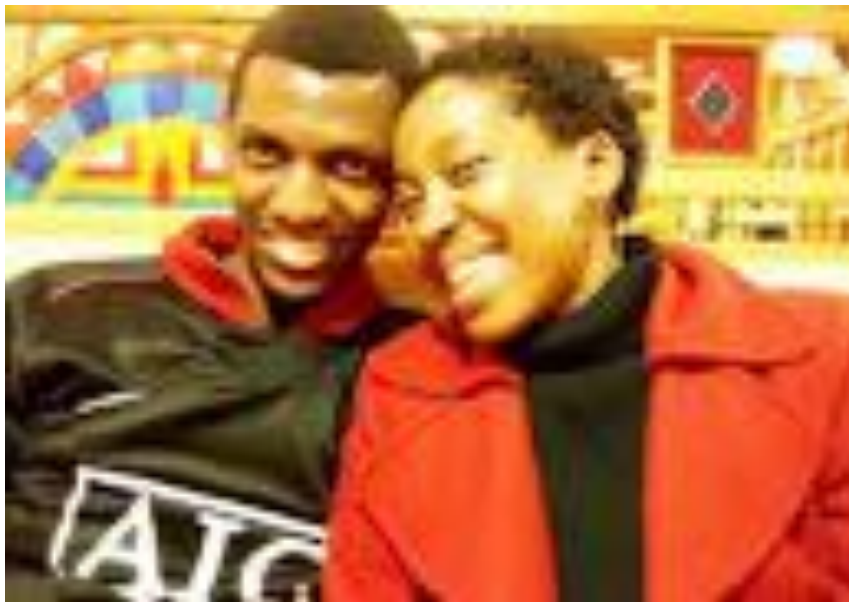

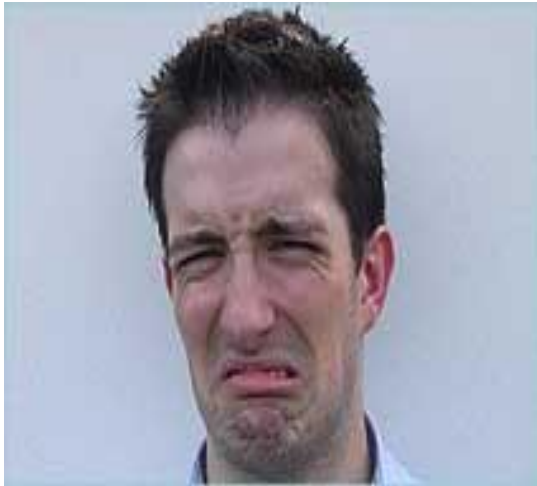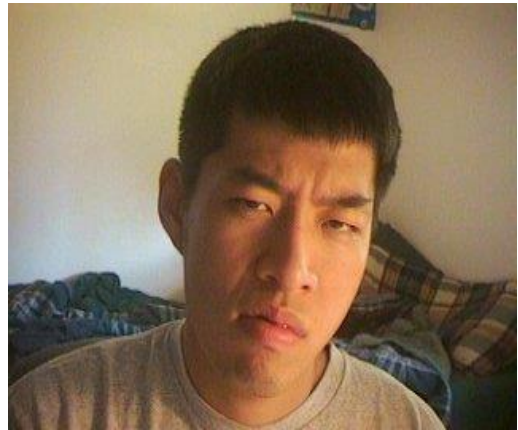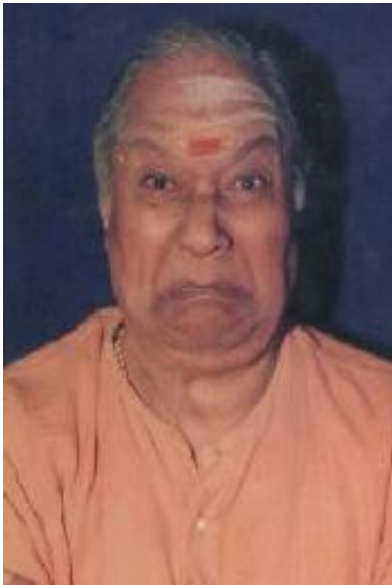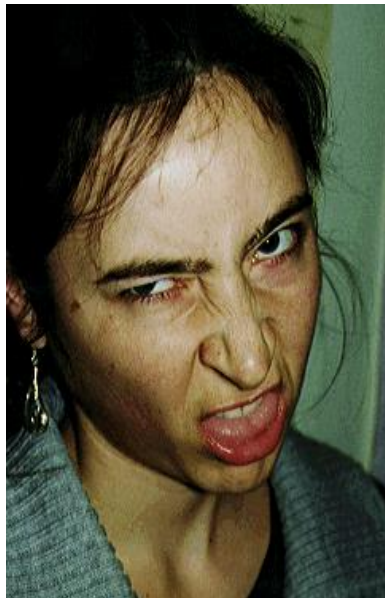

**WHEN NOT TREATED  
STIS ARE NOT PRETTY**

## Common Sexually Transmitted Infections

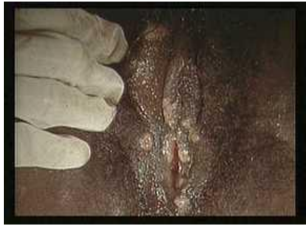

### Syphilis (STIs) (Gcushuwa)

Rash, open sore,  
Discharge,  
**Curable**

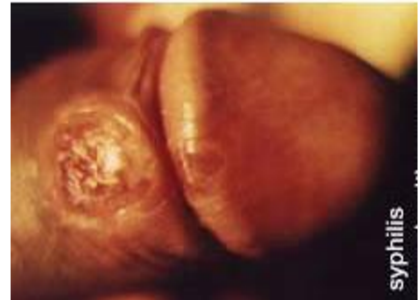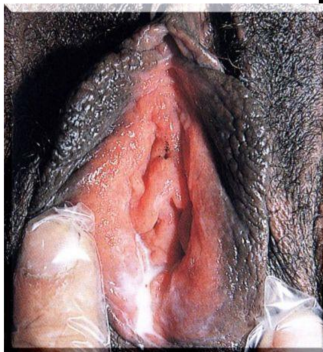

### Gonorrhea (Drop)

Discharge,  
pain/burning  
**Curable**

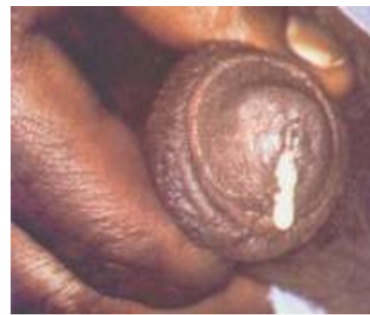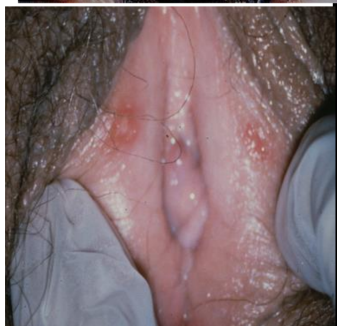

### Genital herpes (Blisters)

Open sores,  
Painful blisters  
**Treatable**

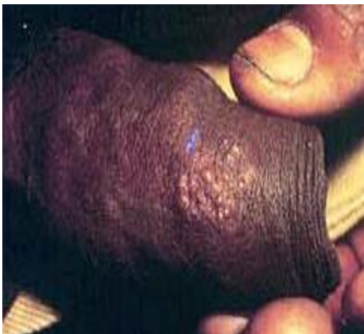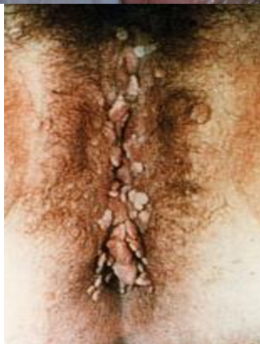

### Genital warts

Painful bumps,  
Can be  
removed  
**Treatable**

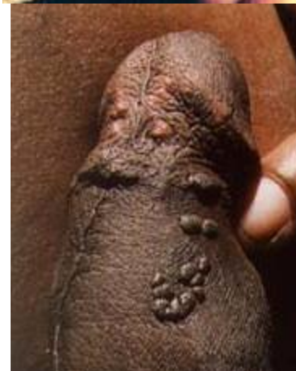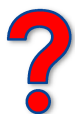

### HIV/AIDS

No signs  
**Treatable**

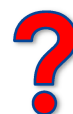



WHAT HAVE YOU  
HEARD ABOUT  
HIV /AIDS?



# You can only get HIV from...

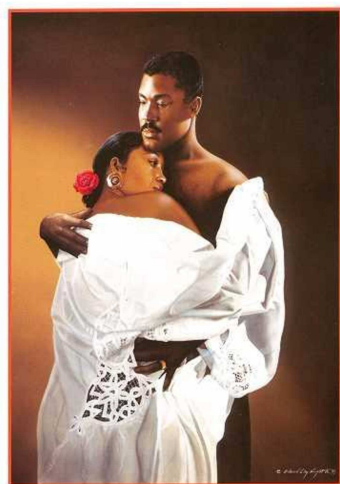

**UNPROTECTED  
SEX**

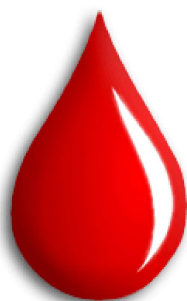

**INFECTED  
BLOOD-INCLUDING  
MENSTRUAL BLOOD**

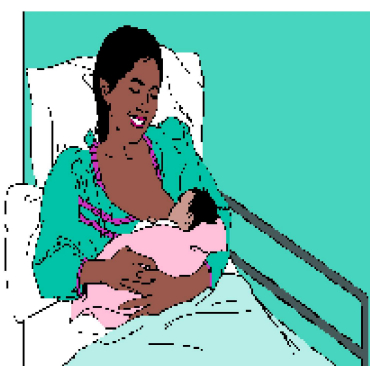

**INFECTED  
MOTHER – TO –  
CHILD**

# You cannot get HIV from...

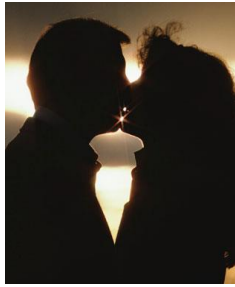

**KISSING**

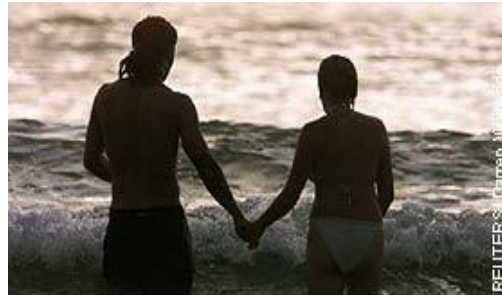

**TOUCHING**

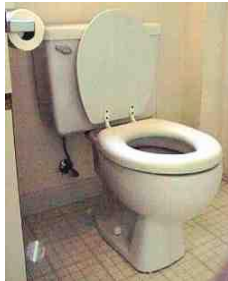

**TOILETS**

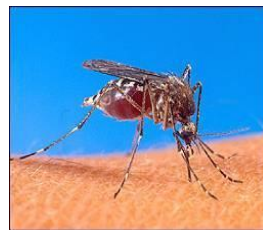

**INSECTS**

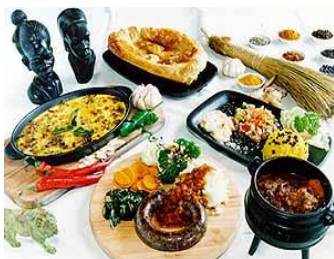

**FOOD**

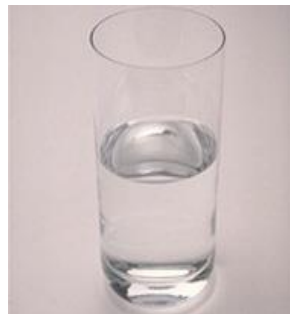

**SHARING UTENSILS**

HOW CAN  
YOU TELL IF  
SOMEONE IS  
LIVING  
WITH HIV?

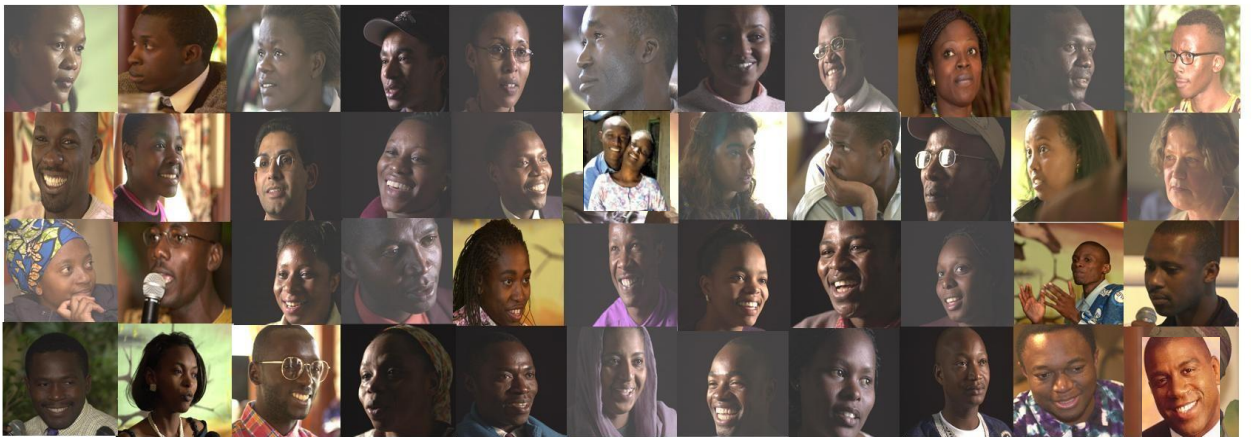

# PEOPLE WHO HAVE HIV-AIDS

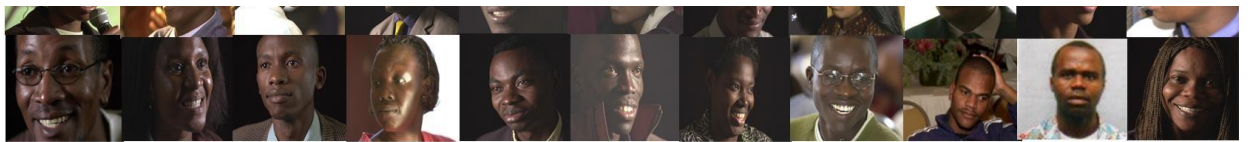

ARE JUST  
LIKE

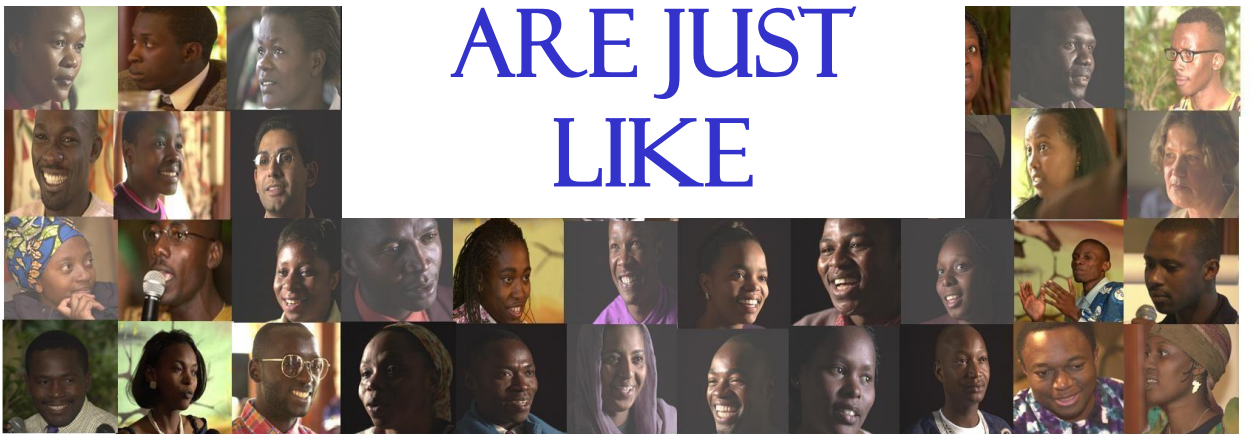

# YOU AND ME

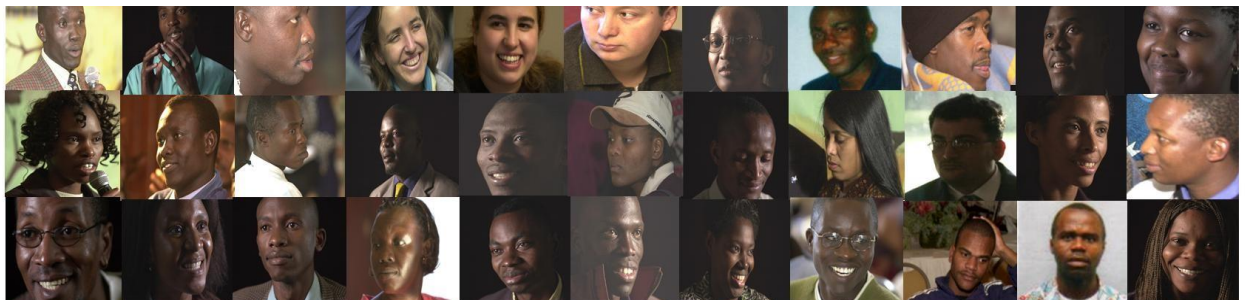

# THE ONLY WAY TO KNOW IF SOMEONE HAS HIV-AIDS IS TO HAVE A HIV TEST

1

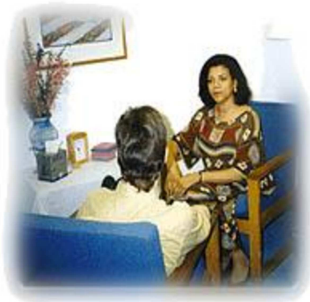

## DISCUSS WITH A COUNSELLOR

2

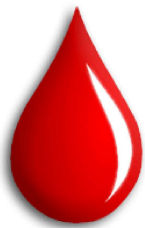

## BLOOD OR SALIVA IS TAKEN

3

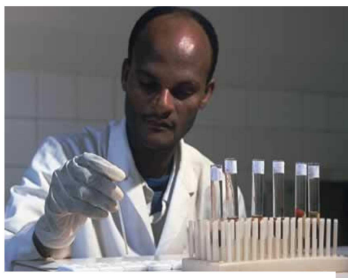

## BLOOD OR SALIVA IS TESTED

4

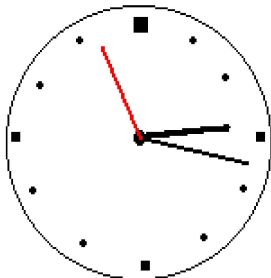

## WAIT A LITTLE

5

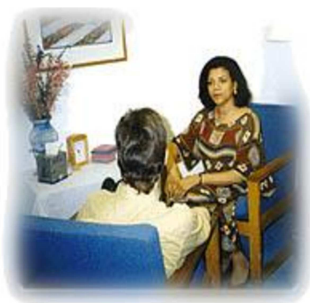

## GET RESULTS... HIV+ OR HIV- ?

# THE FACTS

- ❑ YOU CANNOT GET AIDS FROM TOUCHING, KISSING OR SHARING A KITCHEN/BATHROOM WITH A PERSON WHO HAS HIV/AIDS.
- ❑ MEN CAN GIVE HIV/AIDS TO WOMEN AND WOMEN CAN GIVE HIV/AIDS TO MEN.
- ❑ PREGNANT WOMEN CAN GIVE HIV/AIDS TO THEIR UNBORN CHILD.
- ❑ HIV/AIDS ATTACKS THE BODY'S ABILITY TO FIGHT DISEASES.
- ❑ CONDOMS PROTECT YOU FROM GETTING HIV/AIDS.
- ❑ CONDOMS BREAK IF THEY ARE USED MORE THAN ONE TIME.
- ❑ COMING INTO CONTACT WITH BLOOD, INCLUDING MENSTRUAL BLOOD, CAN EXPOSE YOU TO HIV/AIDS.
- ❑ HAVING SEX WITH A VIRGIN WILL NOT CURE HIV/AIDS.
- ❑ YOU CAN GET HIV/AIDS EVEN IF YOU ONLY HAVE ONE SEX PARTNER.
- ❑ WASHING AFTER SEX DOES NOT PROTECT YOU FROM HIV/AIDS.
- ❑ HIV/AIDS IS NOT CAUSED BY SPIRITS OR SUPERNATURAL FORCES.
- ❑ MALE CIRCUMCISION REDUCES A MAN'S RISK OF GETTING HIV, BUT HE STILL NEEDS TO USE A CONDOM TO BE COMPLETELY PROTECTED.

ANY  
QUESTIONS?

THANK YOU FOR  
PARTICIPATING!
