# Supplementary material for: Effects of enhanced STI partner notification counselling and provider-assisted partner services on partner referral and the incidence of STI diagnosis in Cape Town, South Africa: randomised controlled trial
Source: PubMed Central journal article supplement — Sex Transm Infect. 2020 Jun 1;97(1):38–44. doi: 10.1136/sextrans-2020-054499 (PMC7841487; doi:10.1136/sextrans-2020-054499), 2020-06-01

**Partner #1:** \_\_\_\_\_Fasti One Time Makhwapheni

**Do you use condoms with this partner?**

Yes No Sometimes

**Do you know if this partner has an STI?** Yes No

**Does this partner know you have an STI?** Yes No

**I will (how you plan to tell this partner):**

---

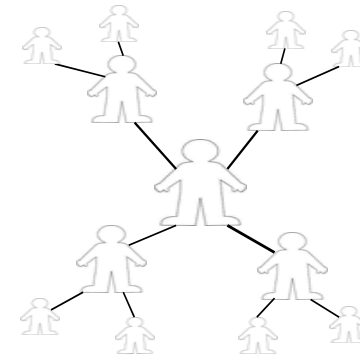

**Partner #2:** \_\_\_\_\_Fasti One Time Makhwapheni

**Do you use condoms with this partner?**

Yes No Sometimes

**Do you know if this partner has an STI?** Yes No

**Does this partner know you have an STI?** Yes No

**I will (how you plan to tell this partner):**

---

**Partner #4:** \_\_\_\_\_Fasti One Time Makhwapheni

**Do you use condoms with this partner?**

Yes No Sometimes

**Do you know if this partner has an STI?** Yes No

**Does this partner know you have an STI?** Yes No

**I will (how you plan to tell this partner):**

---

**Partner #3:** \_\_\_\_\_Fasti One Time Makhwapheni

**Do you use condoms with this partner?**

Yes No Sometimes

**Do you know if this partner has an STI?** Yes No

**Does this partner know you have an STI?** Yes No

**I will (how you plan to tell this partner):**

---

**Partner #5:** \_\_\_\_\_Fasti One Time Makhwapheni

**Do you use condoms with this partner?**

Yes No Sometimes

**Do you know if this partner has an STI?** Yes No

**Does this partner know you have an STI?** Yes No

**I will (how you plan to tell this partner):**

---

## Remember...

- ~STI's get passed in sexual networks.
- ~Your partners probably do not know that they have an STI.
- ~Condoms can stop the spread of STI's.
- ~Telling partners so they can get treated can stop the spread of STI's
- ~Wear a condom till you complete your STI treatment.
- ~Until your partners are treated, partners will keep giving you an STI.

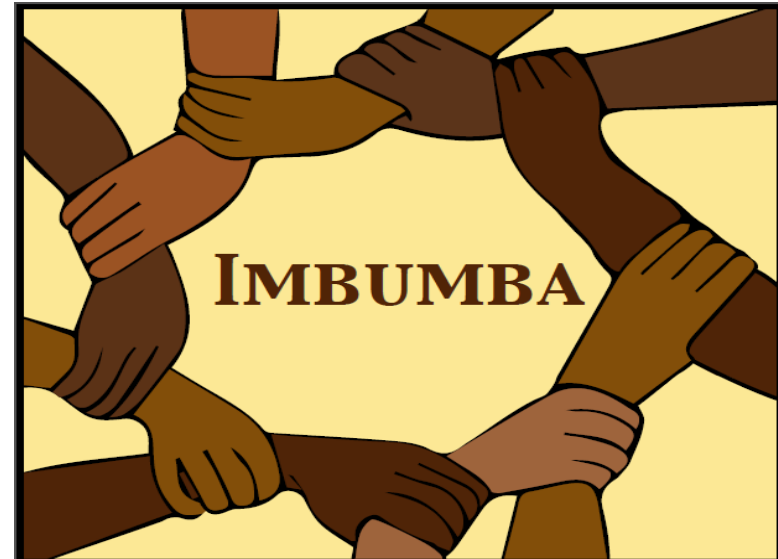

Supplement: sextrans-2020-054499supp007.pdf [file sextrans-2020-054499supp007.pdf]
