# Supplementary material for: Effects of enhanced STI partner notification counselling and provider-assisted partner services on partner referral and the incidence of STI diagnosis in Cape Town, South Africa: randomised controlled trial
Source: PubMed Central journal article supplement — Sex Transm Infect. 2020 Jun 1;97(1):38–44. doi: 10.1136/sextrans-2020-054499 (PMC7841487; doi:10.1136/sextrans-2020-054499), 2020-06-01
Supplement: sextrans-2020-054499supp008.pdf [file sextrans-2020-054499supp008.pdf]

## The FACTS

- ✦ You cannot get AIDS from touching, kissing or sharing a kitchen/bathroom with a person who has HIV/AIDS.
- ✦ Men can give HIV/AIDS to women and women can give HIV/AIDS to men.
- ✦ Pregnant women can give HIV/AIDS to their unborn child.
- ✦ HIV/AIDS attacks the body's ability to fight diseases.
- ✦ Condoms protect you from getting HIV/AIDS.
- ✦ Condoms break if they are used more than one time.
- ✦ Coming into contact with blood, including menstrual blood, can expose you to HIV/AIDS.
- ✦ Having sex with a virgin will NOT cure HIV/AIDS.
- ✦ You can get HIV/AIDS even if you only have one sex partner.
- ✦ Washing after sex does not protect you from HIV/AIDS.
- ✦ HIV/AIDS is not caused by spirits or supernatural forces.
- ✦ Male circumcision reduces a man's risk of getting HIV, but he still needs to use a condom to be completely protected.

## Your Risky Sex Triggers

### People

---



---

### Places

---



---

### Moods/Feelings

---



---

### Substances

---



---

### My goal:

---



---

### Steps to my goal:

1. \_\_\_\_\_
2. \_\_\_\_\_
3. \_\_\_\_\_

### Barriers to my goal:

---



---



---

### Solutions to barriers:

---



---



---

**Remember to**

**Come back for  
your next  
appointment!**

## **POINTS TO REMEMBER**

**HIV/ AIDS is a sexually  
transmitted disease.**

**Fewer partners can  
mean fewer risks.**

**Know your triggers.  
Plan to have safer sex.**

**Talk to your partners.  
Use condoms.**

**Never use any oil or  
Vaseline with condoms.**

**Take steps toward your  
goal.**

**Imbumba  
Personal Plan**
